# Supplementary material for: Prognostic Significance of CXCR4 in Colorectal Cancer: An Updated Meta-Analysis and Critical Appraisal
Source: MDPI journal article supplement (doi:10.3390/cancers13133284), 2021-06-30
Supplement: s1 [file s1]

**Table S1.** Study characteristics I.

| First Author      | Year | Accrual time | No.<br>of pts           | Associated<br>ancillary<br>study | Study<br>design | Newcastle-Ottawa<br>Scale score |
|-------------------|------|--------------|-------------------------|----------------------------------|-----------------|---------------------------------|
| Kim J.            | 2005 | 1996 - 2002  | 125                     | No                               | R               | 7                               |
| Ottaiano A.       | 2006 | 2003 - 2004  | 72                      | Yes                              | R               | 7                               |
| Yoshitake N.      | 2008 | 1990 - 2003  | 60                      | Yes                              | R               | 6                               |
| Speetjens F.M.    | 2009 | 1990 - 2001  | 70 <sup>RT-PCR</sup>    | No                               | R               | 7                               |
| Speetjens F.M.    | 2009 | 1990 - 2001  | 58 <sup>IHC</sup>       | No                               | R               | 7                               |
| Ingold B.         | 2009 | 1995 - 2007  | 402                     | No                               | R               | 6                               |
| Wang SC.          | 2010 | 2001 - 2004  | 388                     | Yes                              | R               | 7                               |
| Yopp A.C.         | 2012 | 2002 - 2004  | 75                      | No                               | R               | 6                               |
| Sakai N.          | 2012 | 1999 - 2007  | 92 <sup>Cytoplasm</sup> | No                               | R               | 7                               |
| Sakai N.          | 2012 | 1999 - 2007  | 92 <sup>Nuclear</sup>   | No                               | R               | 7                               |
| Du C.             | 2014 | 2000 - 2007  | 145                     | No                               | R               | 7                               |
| Gao Y.            | 2014 | 2003 - 2008  | 720                     | No                               | R               | 7                               |
| Stanisavljevic L. | 2015 | 1993 - 1996  | 264 <sup>Cohort 1</sup> | No                               | R               | 7                               |
| Stanisavljevic L. | 2015 | 2007 - 2011  | 225 <sup>Cohort 2</sup> | No                               | R               | 7                               |
| D'Alterio C.      | 2016 | 2007 - 2009  | 31                      | No                               | R               | 6                               |
| Wu W.             | 2016 | 2007 - 2009  | 80                      | Yes                              | R               | 7                               |
| Weixler B.        | 2017 | Not reported | 684                     | No                               | R               | 7                               |
| Xu C.             | 2018 | 2012 - 2017  | 48                      | No                               | R               | 7                               |
| Ottaiano A.       | 2020 | 2004 - 2010  | 78                      | No                               | R               | 7                               |

IHC:ImmunoHistoChemistry; pts: patients; R: Retrospective; RT-PCR: Reverse Transcriptase-Polymerase Chain Reaction.

**Table S2.** Study characteristics II.

| <b>Fist Author</b> | <b>Year</b> | <b>Stage*</b> | <b>Association with lymph-nodal status</b> | <b>Association with T status</b> | <b>Association with side</b> | <b>Association with clinical response</b> | <b>Association with KRAS status</b> |
|--------------------|-------------|---------------|--------------------------------------------|----------------------------------|------------------------------|-------------------------------------------|-------------------------------------|
| Kim J.             | 2005        | I to IV       | Yes                                        | Yes                              | No                           | No                                        | No                                  |
| Ottaiano A.        | 2006        | I-III         | Yes                                        | Yes                              | No                           | NA                                        | No                                  |
| Yoshitake N.       | 2008        | I to IV       | Yes                                        | No                               | No                           | No                                        | No                                  |
| Speetjens FM.      | 2009        | I-III         | Yes                                        | No                               | Yes                          | NA                                        | No                                  |
| Ingold B.          | 2009        | I-IV          | Yes                                        | Yes                              | No                           | No                                        | No                                  |
| Wang SC.           | 2010        | I-IV          | Yes                                        | No                               | Yes                          | No                                        | No                                  |
| Yopp A.C.          | 2012        | IV            | No                                         | No                               | No                           | No                                        | No                                  |
| Sakai N.           | 2012        | IV            | Yes                                        | No                               | No                           | No                                        | No                                  |
| Du C.              | 2014        | I-III         | Yes                                        | Yes                              | Yes                          | No                                        | No                                  |
| Gao Y.             | 2014        | I-IV          | Yes                                        | No                               | No                           | NA                                        | No                                  |
| Stanisavljevic L.  | 2015        | I-III         | Yes                                        | Yes                              | No                           | No                                        | No                                  |
| D'Alterio C.       | 2016        | IV            | No                                         | No                               | No                           | NA                                        | Yes                                 |
| Wu W.              | 2016        | IV            | Yes                                        | No                               | No                           | No                                        | No                                  |
| Weixler B.         | 2017        | I-III         | Yes                                        | Yes                              | Yes                          | NA                                        | No                                  |
| Xu C.              | 2018        | I-IV          | Yes                                        | Yes                              | No                           | No                                        | No                                  |
| Ottaiano A.        | 2020        | IV            | No                                         | No                               | Yes                          | Yes                                       | Yes                                 |

\*According to AJCC (American Joint Committee on Cancer 8<sup>th</sup> Edition)

**Table S3.** Pooled analysis of CXCR4 expression according to clinico-pathological characteristics.

| CXCR4<br>expression      | Age<br>no. (%) |               | <i>P</i> | Gender<br>no. (%) |               | <i>P</i> | T<br>no. (%)  |               | <i>P</i> | Side<br>no. (%) |               | <i>P</i> | Lymphnodes<br>no. (%) |                 | <i>P</i> |
|--------------------------|----------------|---------------|----------|-------------------|---------------|----------|---------------|---------------|----------|-----------------|---------------|----------|-----------------------|-----------------|----------|
|                          | Young          | Old           |          | Male              | Female        |          | ≤2            | ≥3            |          | Left            | Right         |          | Involved              | Not<br>involved |          |
| Negative/Low/<br>Weak    | 518<br>(64.4)  | 577<br>(60.3) |          | 1037<br>(55.1)    | 777<br>(52.6) |          | 300<br>(59.5) | 666<br>(44.0) |          | 293<br>(43.3)   | 218<br>(50.6) |          | 664<br>(57.0)         | 929<br>(59.3)   |          |
| Positive/High/<br>Strong | 287<br>(35.6)  | 380<br>(39.7) | 0.0805   | 846<br>(44.9)     | 700<br>(47.4) | 0.1548   | 204<br>(40.5) | 849<br>(56.0) | 0.0001   | 383<br>(56.7)   | 213<br>(49.4) | 0.0186   | 500<br>(43.0)         | 639<br>(40.7)   | 0.2483   |
